# Supplementary material
Source: PubMed Central journal article supplement (PMC3399776)
Supplement: NIHMS48686-supplement-Fig__S1.pdf [file NIHMS48686-supplement-Fig__S1.pdf]

```

      111 112 113 114 115 116 117 118 119 120 121 122 123 124 125 126 127 128 129 130 131 132 133 134 135 136 137 138 139 140 141 142 143 144 145 146 147 148 149 150
AT5G50580.2 -----MDGDELTEQETALYDRQIRVWGAGAQRRLSKSHVLSVSGIKGIVAEFCNKNI VLAGVGSVLELDDRLVTEVFNANFLILPDERAVYSGKTVAEICCSDSLKDFRPMVHVSIEKGDLSLGVDFFEKFDVVVIGSRATKKVNEKCRRLAKD 150
AT4G24940.1 -----MDGEELTEQETALYDRQIRVWGAGAQRRLSKSHVLSVSGIKGIVAEFCNKNI VLAGVGSVLELDDRLVTEVFNANFLILPDERAVYSGKTVAEICCSDSLKDFRPMVHVSIEKGDLSLGVDFFEKFDVVVIGSRATKKVNEKCRRLAKR 150
POPTR_0012s10270.1 -----MNGEELTEQETALYDRQIRVWGAGAQRRLSKSHVLSVSGIKGIVAEFCNKNI VLAGVGSVLELDDRLVTEVFNANFLILPDERAVYSGKTVAEICCSDSLKDFRPMVHVSIEKGDLSLGVDFFEKFDVVVIGSRATKKVNEKCRRLAKR 150
POPTR_0015s11110.1 -----MDGEELTEQETALYDRQIRVWGAGAQRRLSKSHVLSVSGIKGIVAEFCNKNI VLAGVGSVLELDDRLVTEVFNANFLILPDERAVYSGKTVAEICCSDSLKDFRPMVHVSIEKGDLSLGVDFFEKFDVVVIGSRATKKVNEKCRRLAKR 150
GsVIVT01008554001 -----MDGEELTEQETALYDRQIRVWGAGAQRRLSKSHVLSVSGIKGIVAEFCNKNI VLAGVGSVLELDDRLVTEVFNANFLILPDERAVYSGKTVAEICCSDSLKDFRPMVHVSIEKGDLSLGVDFFEKFDVVVIGSRATKKVNEKCRRLAKR 150
SoLyc03g019730.1.1 MHKRKRIRHTSBAFLQLFCHLRMGTEGEQLTEQETALYDRQIRVWGAGAQRRLSKSHVLSVSGIKGIVAEFCNKNI VLAGVGSVLELDDRLVTEVFNANFLILPDERAVYSGKTVAEICCSDSLKDFRPMVHVSIEKGDLSLGVDFFEKFDVVVIGSRATKKVNEKCRRLAKR 175
SoLyc06g072080.1.1 -----MGKVGEEELTEQETALYDRQIRVWGAGAQRRLSKSHVLSVSGIKGIVAEFCNKNI VLAGVGSVLELDDRLVTEVFNANFLILPDERAVYSGKTVAEICCSDSLKDFRPMVHVSIEKGDLSLGVDFFEKFDVVVIGSRATKKVNEKCRRLAKR 152
LOC_Os11g30410.1 -----MGGGGGAEEELTAQETALYDRQIRVWGAGAQRRLSKSHVLSVSGIKGIVAEFCNKNI VLAGVGSVLELDDRLVTEVFNANFLILPDERAVYSGKTVAEICCSDSLKDFRPMVHVSIEKGDLSLGVDFFEKFDVVVIGSRATKKVNEKCRRLAKR 155
Brad14g18870.2 -----MGG-AGAEELTAQETALYDRQIRVWGAGAQRRLSKSHVLSVSGIKGIVAEFCNKNI VLAGVGSVLELDDRLVTEVFNANFLILPDERAVYSGKTVAEICCSDSLKDFRPMVHVSIEKGDLSLGVDFFEKFDVVVIGSRATKKVNEKCRRLAKR 154
Bb05g017710.1 -----MDGGGAGAGVSGEELTAQETALYDRQIRVWGAGAQRRLSKSHVLSVSGIKGIVAEFCNKNI VLAGVGSVLELDDRLVTEVFNANFLILPDERAVYSGKTVAEICCSDSLKDFRPMVHVSIEKGDLSLGVDFFEKFDVVVIGSRATKKVNEKCRRLAKR 161
GRMZM2G149108_T01 -----MDGGG- -GAGGAEEELTAQETALYDRQIRVWGAGAQRRLSKSHVLSVSGIKGIVAEFCNKNI VLAGVGSVLELDDRLVTEVFNANFLILPDERAVYSGKTVAEICCSDSLKDFRPMVHVSIEKGDLSLGVDFFEKFDVVVIGSRATKKVNEKCRRLAKR 158
1.....10.....20.....30.....40.....50.....60.....70.....80.....90.....100.....110.....120.....130.....140.....150.....160.....170.....

      111 112 113 114 115 116 117 118 119 120 121 122 123 124 125 126 127 128 129 130 131 132 133 134 135 136 137 138 139 140 141 142 143 144 145 146 147 148 149 150
AT5G50580.2 -----VAFYTVDCRDSGGELFVLDQYKNTYKTKK-LDETVCEELTFPSPFEEAVSVPWPKMPRRRTAKLYFAMRVIEFEEAEGRKPGECISLDELPRVLKLRKELCEAGNSVSENHIPDILLERLVS-NMTEFPPVCAIIGGILGQEVIKVIGSGNGEPLKNFFYFDAGDGGVIEDLSH-KL-- 320
AT4G24940.1 -----VAFYTVDCRDSGGELFVLDQYKNTYKTKK-LDETVCEELTFPSPFEEAVSVPWPKMPRRRTAKLYFAMRVIEFEEAEGRKPGECISLDELPRVLKLRKELCEAGNSVSENHIPDILLERLVS-NMTEFPPVCAIIGGILGQEVIKVIGSGNGEPLKNFFYFDAGDGGVIEDLSH-KL-- 322
POPTR_0012s10270.1 VSFYAVDCRDCGGELFVLDQYKNTYKTKK-LDGTATECELQYPSFQEAISVPWRSLPKKVS KLYFAMRVIEFEEAEGRKPGECISLDELPRVLKLRKELCEAGNSVSENHIPDILLERLVS-NMTEFPPVCAIIGGILGQEVIKVIGSGNGEPLKNFFYFDAGDGGVIEDLSH-KL-- 323
POPTR_0015s11110.1 VSFYAVDCRDCGGELFVLDQYKNTYKTKK-LDGTATECELQYPSFQEAISVPWRSLPKKVS KLYFAMRVIEFEEAEGRKPGECISLDELPRVLKLRKELCEAGNSVSENHIPDILLERLVS-NMTEFPPVCAIIGGILGQEVIKVIGSGNGEPLKNFFYFDAGDGGVIEDLSH-KL-- 323
GsVIVT01008554001 IAFYTVDCRDSGGELFVLDQYKNTYKTKK-LDETVCEELQYPSFQEAISVPWRSLPKKVS KLYFAMRVIEFEEAEGRKPGECISLDELPRVLKLRKELCEAGNSVSENHIPDILLERLVS-NMTEFPPVCAIIGGILGQEVIKVIGSGNGEPLKNFFYFDAGDGGVIEDLSH-KL-- 323
SoLyc03g019730.1.1 VAFYTVDCRDSGGELFVLDQYKNTYKTKK-NEETIECKLHYPSFEEAVSVPWRSLPKKVS KLYFAMRVIEFEEAEGRKPGECISLDELPRVLKLRKELCEAGNSVSENHIPDILLERLVS-NMTEFPPVCAIIGGILGQEVIKVIGSGNGEPLKNFFYFDAGDGGVIEDLSH-KL-- 346
SoLyc06g072080.1.1 VAFYTVDCRDSGGELFVLDQYKNTYKTKK-NEETIECKLHYPSFEEAVSVPWRSLPKKVS KLYFAMRVIEFEEAEGRKPGECISLDELPRVLKLRKELCEAGNSVSENHIPDILLERLVS-NMTEFPPVCAIIGGILGQEVIKVIGSGNGEPLKNFFYFDAGDGGVIEDLSH-KL-- 318
LOC_Os11g30410.1 IAFYTVDCRDSGGELFVLDQYKNTYKTKK-NEETIECKLHYPSFEEAVSVPWRSLPKKVS KLYFAMRVIEFEEAEGRKPGECISLDELPRVLKLRKELCEAGNSVSENHIPDILLERLVS-NMTEFPPVCAIIGGILGQEVIKVIGSGNGEPLKNFFYFDAGDGGVIEDLSH-KL-- 328
Brad14g18870.2 IAFYTVDCRDSGGELFVLDQYKNTYKTKK-NEETIECKLHYPSFEEAVSVPWRSLPKKVS KLYFAMRVIEFEEAEGRKPGECISLDELPRVLKLRKELCEAGNSVSENHIPDILLERLVS-NMTEFPPVCAIIGGILGQEVIKVIGSGNGEPLKNFFYFDAGDGGVIEDLSH-KL-- 328
Bb05g017710.1 IAFYTVDCRDSGGELFVLDQYKNTYKTKK-NEETIECKLHYPSFEEAVSVPWRSLPKKVS KLYFAMRVIEFEEAEGRKPGECISLDELPRVLKLRKELCEAGNSVSENHIPDILLERLVS-NMTEFPPVCAIIGGILGQEVIKVIGSGNGEPLKNFFYFDAGDGGVIEDLSH-KL-- 335
GRMZM2G149108_T01 IAFYTVDCRDSGGELFVLDQYKNTYKTKK-NEETIECKLHYPSFEEAVSVPWRSLPKKVS KLYFAMRVIEFEEAEGRKPGECISLDELPRVLKLRKELCEAGNSVSENHIPDILLERLVS-NMTEFPPVCAIIGGILGQEVIKVIGSGNGEPLKNFFYFDAGDGGVIEDLSH-KL-- 333
..180.....190.....200.....210.....220.....230.....240.....250.....260.....270.....280.....290.....300.....310.....320.....330.....340.....350

```

**Fig. S1** Alignment of SUMO activating enzyme subunit 1 (SAE1) protein sequences
