# Supplementary material
Source: PubMed Central journal article supplement (PMC3399776)
Supplement: NIHMS48686-supplement-Fig__S3.pdf [file NIHMS48686-supplement-Fig__S3.pdf]

```

*      1      2      3      4      5      6      7      8      9     10     11     12     13     14     15     16     17     18     19     20     21     22     23     24     25     26     27     28     29     30     31     32     33     34     35     36     37     38     39     40     41     42     43     44     45     46     47     48     49     50     51     52     53     54     55     56     57     58     59     60     61     62     63     64     65     66     67     68     69     70     71     72     73     74     75     76     77     78     79     80     81     82     83     84     85     86     87     88     89     90     91     92     93     94     95     96     97     98     99     100
AT3G57870.1      -M-ASGIARGRLAERKSWRKNHPHGFAKPEETGQDGVNLMVWHCTIPGKAGTDWEGGYFPLTLHFS EDYPSKPPKCKF PGFFHPNVYPSGTVCLSILNEDYGWRPAITVKQILVGIQDLDLTPNPADPAQTDGYHLFCQDPVEYKRRVKLQSKQY PALV-- 160
POPTR_0014a02480.1 -MSGGIIARGRLAERKSWRKNHPHGFAKPDNAQDGLDLMLVWKCIIIPGKPGTDWEGGYFPLTLHFS EDYPSKPPKCKF PGFFHPNVYPSGTVCLSILNEDYGWRPAITVKQILVGIQDLDLTPNPADPAQTDGYQLFVQDPTEYKRRVRQAKQY PPAAL-- 161
POPTR_0014a02500.1 -MSGGIIARGRLAERKSWRKNHPHGFAKPDNAQDGLDLMLVWKCIIIPGKPGTDWEGGYFPLTLHFS EDYPSKPPKCKF PGFFHPNVYPSGTVCLSILNEDYGWRPAITVKQILVGIQDLDLTPNPADPAQTDGYQLFVQDPTEYKRRVRQAKQY PPAAL-- 161
POPTR_0002a12510.1 -MSGGIIARGRLAERKAWRKNHPHGFAKPDNADGSLDLMLVWKCIIIPGKPGTDWEGGYFPLTLHFS EDYPSKPPKCKF PGFFHPNVYPSGTVCLSILNEDYGWRPAITVKQILVGIQDLDLTPNPADPAQTDGYQLFVQDPAEYKRRVRQAKLY PPTL-- 161
POPTR_0005a18460.1 -M-SGGIARGRLAERKSWRKNHPHGFAKPEETGPDGVNLMVWHCTIPGKAGTDWEGGYFPLTLHFS EDYPSKPPKCKF PGFFHPNVYPSGTVCLSILNEDS GWRPAITVKQILVGIQDLDLTPNPADPAQTDGYHLFIQDAEYKRRVRQAKQY PSLV-- 160
GSVIVT010209446001 -M-SGGIARGRLAERKAWRKNHPHGFAKPEETGPDGVNLMVWHCTIPGKAGTDWEGGYFPLTLHFS EDYPSKPPKCKF PGFFHPNVYPSGTVCLSILNEDS GWRPAITVKQILVGIQDLDLTPNPADPAQTDGYQLFIQDAEYKRRVRQAKQY PSLV-- 160
OSVIVT01022074001 -M-SAGIARGRLMEERKAWRKNHPHGFAKPEETLPGQVNLMLVWQCTIPGKPGTDWEGGYFPLTLHFS EDYPSKPPKCKF PGFFHPNVYPSGTVCLSILNEDS GWRPAITVKQILVGIQDLDLTPNPADPAQTDGYHLFIQDAEYKRRVRQAKQY PPLVGY 162
Solyc04g078620.1.1 -M-SGGIARGRLTEERKAWRKNHPHGFAKPEETGPDGVNLMVWQCTIPGKPGTDWEGGYFPLTLHFS EDYPSKPPKCKF PGFFHPNVYPSGTVCLSILNEDS GWRPAITVKQILVGIQDLDLTPNPADPAQTDGYQLYMDQDFEYKRRVRQAKQY PALL-- 160
Solyc12g088680.1.1 -M-ADGIARGRLTEERKSWRKNHPHGFAKPEETGADGSLNLMVWHCSIIPGKAKTDWEGGYFPLTLHFS EDYPSKPPKCKF PGFFHPNVYPSGTVCLSILNEDS GWRPAITVKQILVGIQDLDLTPNPADPAQTDGYQLYMDGAEYKRRVRQAKQY PAPV-- 160
Solyc02g093110.1.1 -M-SGGIARGRLAERKAWRKNHPHGFAKPEETLPGDGVNLMVWHCTIPGKAGTDWEGGYFPLTLHFS EDYPSKPPKCKF PGFFHPNVYPSGTVCLSILNEDS GWRPAITVKQILVGIQDLDLTPNPADPAQTDGYHMF IQDVEYKRRVRLQSKQY PPLV-- 160
Solyc03g044260.1.1 -M-SAGIARGRLAERKAWRKNHPHGFAKPEETLPGDGVNLMVWHCSIIPGKAGTDWEGGYFPLTLHFS EDYPSKPPKCKF PGFFHPNVYPSGTVCLSILNEDS GWRPAITVKQILVGIQDLDLTPNPADPAQTDGYHLFIQDAEYKRRVRLQAKQY PPLV-- 160
LOC_0a10g39120.1 -M-SGGIARGRLAERKAWRKNHPHGFAKPEETMADGSLNLMVWHCTIPGKAGTDWEGGYFPLTLHFS EDYPSKPPKCKF PGFFHPNVYPSGTVCLSILNEDS GWRPAITVKQILVGIQDLDLTPNPADPAQTDGYHIF IQDKPEYKRRVRQAKQY PALL-- 160
LOC_0a03g03130.1 -M-SGGIARGRLAERKAWRKNHPHGFAKPEETLADGTVNLMVWHCTIPGKAGTDWEGGYFPLTLHFS EDYPSKPPKCKF PGFFHPNVYPSGTVCLSILNEDS GWRPAITVKQILVGIQDLDLTPNPADPAQTDGYHLFIQDPTEYKRRVRLQAKQY PPIV-- 160
Bradi3g32080.1 -MSGGIIARGRLAERKAWRKNHPHGFAKPEETVADGSLNLMVWHCTIPGKAGTDWEGGYFPLTLHFS EDYPSKPPKCKF PGFFHPNVYPSGTVCLSILNEDS GWRPAITVKQILVGIQDLDLTPNPADPAQTDGYHLFIQDPAEYKRRVRLQAKQY PALI-- 161
Bradi1g77010.1 -M-SGGIARGRLAERKAWRKNHPHGFAKPEETLPGDGVNLMVWHCTIPGKAGTDWEGGYFPLTLHFS EDYPSKPPKCKF PGFFHPNVYPSGTVCLSILNEDS GWRPAITVKQILVGIQDLDLTPNPADPAQTDGYHLFIQDPTEYKRRVRLQAKQY PPLV-- 160
Sb01g030580.1 -M-SGGIARGRLAERKAWRKNHPHGFAKPEETLPGDGVNLMVWHCTIPGKAGTDWEGGYFPLTLHFS EDYPSKPPKCKF PGFFHPNVYPSGTVCLSILNEDS GWRPAITVKQILVGIQDLDLTPNPADPAQTDGYHLFIQDPAEYKRRVRLQAKQY PALV-- 160
GRMZM2G063931_T01 -M-SGGIARGRLAERKAWRKNHPHGFAKPEELPDGTVNLMVWHCTIPGKAGTDWEGGYFPLTLHFS EDYPSKPPKCKF PGFFHPNVYPSGTVCLSILNEDS GWRPAITVKQILVGIQDLDLTPNPADPAQTDGYHLFIQDPTEYKRRVRLQAKQY PALV-- 160
GRMZM2G070047_T01 -M-SGGIARGRLAERKAWRKNHPHGFAKPEELPDGTVNLMVWHCTIPGKAGTDWEGGYFPLTLHFS EDYPSKPPKCKF PGFFHPNVYPSGTVCLSILNEDS GWRPAITVKQILVGIQDLDLTPNPADPAQTDGYHLFIQDPTEYKRRVRLQAKQY PALV-- 160
GRMZM2G312693_T01 -M-SGGIARGRLAERKAWRKNHPHGFAKPEETLADGSLNLMVWHCTIPGKAGTDWEGGYFPLTLHFS EDYPSKPPKCKF PGFFHPNVYPSGTVCLSILNEDS GWRPAITVKQILVGIQDLDLTPNPADPAQTDGYHLFIQDPTEYKRRVRLQAKQY PALV-- 160
GRMZM2G163398_T01 -M-SGGIARGRLAERKAWRKNHPHGFAKPEELADGSLNLMVWHCTIPGKAGTDWEGGYFPLTLHFS EDYPSKPPKCKF PGFFHPNVYPSGTVCLSILNEDS GWRPAITVKQILVGIQDLDLTPNPADPAQTDGYHLFIQDPAEYKRRVRLQAKQY PALV-- 160
LOC_0a04g49130.1 MASGGIIARARLAEERKAWRKNHPHGFAKPEETLPGDGVNLMVWHCTIPGKAGTDWEGGYFPLTLHFS EDYPSKPPKCKF PGFFHPNVYPSGTVCLSILNEDS GWRPAITVKQILVGIQDLDLTPNPADPAQTDGYHLFIQDPAEYKRRVRLQAKQY PPAAL-- 160
Bradi5g19200.1 -MASGGIARARLAEERKSWRKNHPHGFAKPDZLPGDGVNLMVWHCTIPGKAGTDWEGGYFPLTLHFS EDYPSKPPKCKF PGFFHPNVYPSGTVCLSILNEDS GWRPAITVKQILVGIQDLDLTPNPADPAQTDGYHLFIQDPAEYKRRVRLQAKQY PPAAL-- 160
Sb06g026250.1 -MASGGIARGRLAERKSWRKNHPHGFAKPEETLPGDGVNLMVWHCTIPGKAGTDWEGGYFPLTLHFS EDYPSKPPKCKF PGFFHPNVYPSGTVCLSILNEDS GWRPAITVKQILVGIQDLDLTPNPADPAQTDGYHLFIQDPAEYKRRVRLQAKQY PPAAL-- 160
Sb06g026280.1 -MASGGIARARLAEERKSWRKNHPHGFAKPEETLPGDGVNLMVWHCTIPGKAGTDWEGGYFPLTLHFS EDYPSKPPKCKF PGFFHPNVYPSGTVCLSILNEDS GWRPAITVKQILVGIQDLDLTPNPADPAQTDGYHLFIQDPAEYKRRVRLQAKQY PPAAL-- 160
Sb06g026270.1 -MATGGIARGRLAERKAWRKNHPHGFAKPEETLPGDGVNLMVWHCTIPGKAGTDWEGGYFPLTLHFS EDYPSKPPKCKF PGFFHPNVYPSGTVCLSILNEDS GWRPAITVKQILVGIQDLDLTPNPADPAQTDGYHLFIQDPAEYKRRVRLQAKQY PPAAL-- 160
GRMZM2G038851_T01 -MASGGIARARLAEERKSWRKNHPHGFAKPEETLPGDGVNLMVWHCTIPGKAGTDWEGGYFPLTLHFS EDYPSKPPKCKF PGFFHPNVYPSGTVCLSILNEDS GWRPAITVKQILVGIQDLDLTPNPADPAQTDGYHLFIQDPAEYKRRVRLQAKQY PPAAL-- 160
GRMZM2G341089_T02 -MASGGIARGRLAERKAWRKNHPHGFAKPEETLPGDGVNLMVWHCTIPGKAGTDWEGGYFPLTLHFS EDYPSKPPKCKF PGFFHPNVYPSGTVCLSILNEDS GWRPAITVKQILVGIQDLDLTPNPADPAQTDGYHLFIQDPAEYKRRVRLQAKQY PPAAL-- 160
GRMZM2G433968_F  MLASAIFA-----SIVSILVIOQPPKKIATIKLFCFLAALAAKRLTDWEGGYFVTLHFTENYPSNPPCKFRFRFFHVNVYDSGDVCLSILGD--AWAPSI TVRQILIGIQELLENNPASPADFAVDVFAE----- 129
GRMZM2G146142_F  MLASTEFA-----SRVSIIVIQPPKKIATIKLFCFLAALAAKRLTDWEGGYFVTLHFTENYPSNPPCKFRFRFFHVNVYDSGDVCLSILGD--AWAPSI TVRQILIGIQELLENNPASPADFAVDVFAE----- 128
1.....10.....20.....30.....40.....50.....60.....70.....80.....90.....100.....110.....120.....130.....140.....150.....160.....

```

Fig. S3 Alignment of SUMO conjugating enzyme (SCE) protein sequences
