# Supplementary material
Source: PubMed Central journal article supplement (PMC3399776)
Supplement: NIHMS48686-supplement-Fig__S6.pdf [file NIHMS48686-supplement-Fig__S6.pdf]

```

*:*
AT3G15150.1 MASASSDQ-----VAGRIQNASLVLVSDNSSLADIRKAVAMMKNIADVLEKENQTDKVKDLENSVAELLDLHSDGNHRSTAIQSVANRYQVVEQLTDFKKLLEDEFTKPKATPSSVQNDHLMRQFREAVVNVVHAGPMPGDDDED 144
POPTR_0011s14450.1 MASTSAPRGGDVPASAGIMTTSASMLCSENQSLIVEMRKVFNMMEIAVDLERENESAKVNELENTVAELLATYEDCTYQTSALIESVGNTRYQGAELTDFKKLLEDEFMKFKGNKSSAPQNHPLLRQFREAVVNVVHAGPMPGDEEHED 150
GSVIVT01014276001 MASPEDSGT-----PLPLSTPITNLS-----LLKFRKAMILMKEVAVDLERDQGSQVMKLEDAVVELLGTSEDCQPSAAIQSVGNEHQPRPELTDFFKLFEDVAKLKASSFAQSHPLLRQFREAVVNVVHAGPMPGDEQED 137
Solyc07g062780.1.1 MASTSGAGS-----GVAAGRIRSHTSALYSDSQSLILEIRKSVTMMKDIADVLERDERTQMVKLEDEGVVQLLAASDECMLHSEAIQSIGDTEPGEPTNFKKKFDDEIAKSKARSSHTQNSQLLRQFREAVVNVVHAGPMPGDEQED 146
LOC_Os05g48880_F VVVKLTNAARESSSEAEETLAEIRKKAIGEMKSIADVLERENKSDKVKQLEAAALELVASCEDCTCYADAIRKVPQYQPSNQMTDFEKLIEAEVNVKVGNSSTVENHLLIRQFREAVVNVVHAGPMPGDEQED 138
Bradi2g16600.1 MSS-----AAMKLANAADASSEEAQSLIADMRKAVNTRMSIAVEFEKANMSDKVKEVEKEMLELLASVEDCAFLAEAVKAVPQIYQPSDQPTDFKRLIEAEVTKIKGNSRVSGHCQQLVRQFREAVVNVVHAGPMPGDEQEE 138
Bradi2g16577.1 MSS-----AAMKLANAADTSSEESSQLIADMRKAVNTRMSIAVEFEKANMSDKVKEVEKEMLELLASVEDCAFLAEAVKAVPQIYQPSDQPTDFKRLIEAEVTKIKGNSRVSGHCQQLVRQFREAVVNVVHAGPMPGDEQEE 138
Sb09g028460.1 MTS-----MATKLVNTAEVASSQAQLVADMRKAVNTRMSIAVEFEKANMSDKVKEVEKEMLELLASVEDCAFLAEAVKAVPQIYQPSDQPTDFKRLIEAEVTKIKGNSRVSGHCQQLVRQFREAVVNVVHAGPMPGDEQED 138
GRMZM2G022065_T01 MSS-----MATKLVNTAEVASSQAQLVADMRKAVNTRMSIAVEFEKANMSDKVKEVEKEMLELLASVEDCAFLAEAVKAVPQIYQPSDQPTDFKRLIEAEVTKIKGNSRVSGHCQQLVRQFREAVVNVVHAGPMPGDEQED 138
1.....10.....20.....30.....40.....50.....60.....70.....80.....90.....100.....110.....120.....130.....140.....150

*****
AT3G15150.1 IVMTSTQCPLLNMTCPPLSGRPVTELADPVR-----SMDGRHVYKESVILHYI-VNNPN--ANCPVAGCRGKLQNSKVIDDAMLKFEIEMRSLNKQSNRAEVIEDFTEDVDED----- 249
POPTR_0011s14450.1 IVMTSTQSTILNITCPLSGRPITELADPVR-----GVDCKHVYKKAIMGYI-SLNAQ--AKCPVTGCPRYLRQDKVSDPDLLEVEIEMRSMKSNMTATLVEDFTMTDDEED----- 257
GSVIVT01014276001 IVMTSTCNLLNITCPLSGRPVTELADPVR-----SVDCKHVYKKAIMGYI-SLNAQ--AKCPVTGCPRYLRQDKVSDPDLLEVEIEMRSMKSNMTATLVEDFTMTDDEED----- 250
Solyc07g062780.1.1 IVMTSTCNLLNITCPLSGRPVTELADPVR-----SMDCKHIYDKRKAIMGYI-SLNAQ--AKCPVTGCPRYLRQDKVSDPDLLEVEIEMRSMKSNMTATLVEDFTMTDDEED----- 255
LOC_Os05g48880_F VLMTSTQTSILNVTQPLTGKPVIELTEPVR-----CADCRHIYDKRKAIMGYI-SLNAQ--AKCPVTGCPRYLRQDKVSDPDLLEVEIEMRSMKSNMTATLVEDFTMTDDEED----- 245
Bradi2g16600.1 LVMTSTQRNVLNIKQPIITMCPVIELTEPVR-----CPCRHIYDKRKAIMGYI-SLNAQ--AKCPVTGCPRYLRQDKVSDPDLLEVEIEMRSMKSNMTATLVEDFTMTDDEED----- 254
Bradi2g16577.1 LVMTSTQRNVLNIKQPIITMCPVIELTEPVR-----CPCRHIYDKRKAIMGYI-SLNAQ--AKCPVTGCPRYLRQDKVSDPDLLEVEIEMRSMKSNMTATLVEDFTMTDDEED----- 254
Sb09g028460.1 IVMTSTQMSILNVTQPLTGKPVIELTEPVR-----CVDCKHIYDKRKAIMGYI-SLNAQ--AKCPVTGCPRYLRQDKVSDPDLLEVEIEMRSMKSNMTATLVEDFTMTDDEED----- 245
GRMZM2G022065_T01 IVMTSTQMSILNVTQPLTGKPVIELTEPVR-----CVDCKHIYDKRKAIMGYI-SLNAQ--AKCPVTGCPRYLRQDKVSDPDLLEVEIEMRSMKSNMTATLVEDFTMTDDEED----- 245
.....160.....170.....180.....190.....200.....210.....220.....230.....240.....250.....260.....270.....280...

```

Fig. S6 Alignment of SUMO ligase HPY2 type protein sequences
