# Supplementary material
Source: PubMed Central journal article supplement (PMC3399776)
Supplement: NIHMS48686-supplement-Fig__S7.pdf [file NIHMS48686-supplement-Fig__S7.pdf]

|                    |                                                                                                                                                                                                         |     |
|--------------------|---------------------------------------------------------------------------------------------------------------------------------------------------------------------------------------------------------|-----|
| AT5G41580.1        | *MSTAAAARF-----VAGTGLREK-TAASLVNFRLASVTRQLRYHIQ--DGAKV-----DFKFEQ ICCISFAKGI DFIANNDIFPKVVEFPWLLKQLCRHQTIVY--TKTALMVLMISVKHACHLGWFSDESQ ELIALADEIRTC FSGSSTPSGIKSPGSFFSQIMERFY                          | 158 |
| AT1G08910.1        | MVIPATSF-----GFR-----AEF-----MKFEQASCISLANEIDAIAIANNVEFGNIQLLALILNNVCRKCDQYTRAVVMLMISVSKACQGLWFPERETQLLAIIDLWNGVFSCPENVTSCVNSPVTLLISQVIERFY                                                             | 128 |
| POPTR_0003s13280.1 | MVGMAGM--MPPFQVAGVTIRAAQO--MSASLANFRVHAAERLSLHIQ--PGFDS--NTEFFGLCSLARIGDFAVANNETLLKAGLELPLLKVQCVRGQVFR--LQAAIMVLMASVKNACMVGWFOEKETQLVTLATEIGKVFCTPGDINAQTSLSIIPTMISRFY                                  | 167 |
| GSVVT01026971001   | MAGESRM--ATIGSvGGGHH--SLLVASVADLLMH1Q--SGQLL--DSAEFSLMCLSLARIGYAVANNEIPVARDPLPLLKQVLRNMNDSS--LVAFFVLMISVKNACKI GWFDPHDANDLLALAKEIKGMFSTMEDINAVFPYS--LLNMWKMLRYI                                         | 153 |
| GSVVT01019423001   | MAG--MSY--TDDGGGRIRIFA-----SRLVAVYADLLAMHIQ--NGHFL--DSEAVADLFSLARIGYDHAVANNEIPVARDPLPLLKQVLRNMNDSS--LVAFFVLMISVKNACKI GWFDPHDANDLLALAKEIKGMFSTMEDINAVFPYSVSKIMSRIT                                      | 151 |
| Soly08g008130.1.1  | MGATISLF-----TSYINIAGVETITYS--ISASLANSFRLLNAVELERLAMHVR--SGHRLLDGRSGFEFHMCLSLARIGYDILSANGVEVRFVDDLPLRLQICQRKMLF--LGGIMVLMISVKNACKI GWFTEKDAKELD LA NEI SSGFTMLDIPMFS NSSSTII STIMSRF                    | 169 |
| LOC_0s06g06870.1   | W-----PMYDGMFQISGKAM--TASYSFRISAADAKVTC--NQKWT--DPIEFLCLSLARIGYDILSANGVEVRFVDDLPLRLQICQRKMLF--LGAIMVLMISVKNACKI GWFTEKDAKELD LA NEI SSGFTMLDIPMFS NSSSTII STIMSRF                                       | 164 |
| Bradi1g48426_F     | M-----ASAAPLPTPPFPQQGQPQFKKQOQ--QNAVAMNARRLVMI GDLRLTHRFGQGGVTLF-----EPPDLAHLVYAFARIGDFALS GGDPVTASIEIIPSLKVLVYKQDF--LQSSVMVLMISVKNACKI GWFTEKDAKELD LA NEI SSGFTMLDIPMFS NSSSTII STIMSRF               | 170 |
| Sb10g004470_F      | MAGI AASLF--PTAPAPAQOQMGOQQA REQLQKAVEMNAKRAIGERIRGRHR--GGAAAL--PFAELSHLVYAFARIGDIFALS GGDPVKMAPVEPDLIRKVTQLRREFS--IQSSVMVLMISVKNACKI GWFTEKDAKELD LA NEI SSGFTMLDIPMFS NSSSTII STIMSRF                 | 172 |
| GRMZM2G075582_T01  | MATAARATPHFPPTPLQQOQHQDQKQ--QKALSMNAIRLKAIGDLRKAHR--GMNVP--PTAEFAHLVYAFARIGDIFAVSAGDIFDILKMGDIPDILRQLRREFF--IQSSVMVLMISVKNACKI GWFTEKDAKELD LA NEI SSGFTMLDIPMFS NSSSTII STIMSRF                        | 170 |
|                    | MTNAAATPHFPPTPLQQOQHQDQKQ--QKALALNAFRLKGI GDLRIFHLK--GMVVP--PVAELAHLVYAFARIGDIFAVSAGDIFDILKMGDIPDILRQLRREFF--IQSSVMVLMISVKNACKI GWFTEKDAKELD LA NEI SSGFTMLDIPMFS NSSSTII STIMSRF                       | 169 |
|                    | 1.....10.....20.....30.....40.....50.....60.....70.....80.....90.....100.....110.....120.....130.....140.....150.....160.....170.....180                                                                |     |
| AT5G41580.1        | *FVKLGHVLSVEFKAGYTMLAHDFYISKNMPSHQEKIRLFAVQTDNI DTSACISNPPEVFSLLNGKVEKRVINAMDTPQLPFPMTAQLKYGTMLLQVMGKFNKGNII I IAFPQVLPVPEKPVLDLQSGVI EASPSDII EGPSR-----VSLSCPISRKRIKLPVKGQCKHL                        | 332 |
| AT1G08910.1        | FCVKLGHVLSVEFKAGYTMLAHDFYISKNMPSHQEKIRLFAVQTDNI DTSACISNPPEVFSLLNGKVEKRVINAMDTPQLPFPMTAQLKYGTMLLQVMGKFNKGNII I IAFPQVLPVPEKPVLDLQSGVI EASPSDII EGPSR-----VSLSCPISRKRIKLPVKGQCKHL                        | 302 |
| POPTR_0003s13280.1 | FLMKMGQIVSLELVKPGFAGVYDFHTISKITRMSYEDYI--RAI SPALVRSGNFIPT-----PFAEFAHLVYAFARIGDIFALS GGDPVKMAPVEPDLIRKVTQLRREFS--IQSSVMVLMISVKNACKI GWFTEKDAKELD LA NEI SSGFTMLDIPMFS NSSSTII STIMSRF                  | 295 |
| GSVVT01026971001   | PRFRMGHMLASLDVKPGFAGVYDFHTISKITRMSYEDYI--RAI SPALVRSGNFIPT-----PFAEFAHLVYAFARIGDIFALS GGDPVKMAPVEPDLIRKVTQLRREFS--IQSSVMVLMISVKNACKI GWFTEKDAKELD LA NEI SSGFTMLDIPMFS NSSSTII STIMSRF                  | 325 |
| GSVVT01026973001   | PRRIMGSHVLASLELVKPGFAGVYDFHTISKITRMSYEDYI--RAI SPALVRSGNFIPT-----PFAEFAHLVYAFARIGDIFALS GGDPVKMAPVEPDLIRKVTQLRREFS--IQSSVMVLMISVKNACKI GWFTEKDAKELD LA NEI SSGFTMLDIPMFS NSSSTII STIMSRF                | 325 |
| GSVVT01019423001   | PRRIMGQILASRELVKPGFAGVYDFHTISKITRMSYEDYI--RAI SPALVRSGNFIPT-----PFAEFAHLVYAFARIGDIFALS GGDPVKMAPVEPDLIRKVTQLRREFS--IQSSVMVLMISVKNACKI GWFTEKDAKELD LA NEI SSGFTMLDIPMFS NSSSTII STIMSRF                 | 325 |
| Soly08g008130.1.1  | PRMKMGQIVSLELVKPGFAGVYDFHTISKITRMSYEDYI--RAI SPALVRSGNFIPT-----PFAEFAHLVYAFARIGDIFALS GGDPVKMAPVEPDLIRKVTQLRREFS--IQSSVMVLMISVKNACKI GWFTEKDAKELD LA NEI SSGFTMLDIPMFS NSSSTII STIMSRF                  | 338 |
| LOC_0s06g06870.1   | LoC_0s06g06870.1 PRLKMGQIVSLELVKPGFAGVYDFHTISKITRMSYEDYI--RAI SPALVRSGNFIPT-----PFAEFAHLVYAFARIGDIFALS GGDPVKMAPVEPDLIRKVTQLRREFS--IQSSVMVLMISVKNACKI GWFTEKDAKELD LA NEI SSGFTMLDIPMFS NSSSTII STIMSRF | 341 |
| Bradi1g48426_F     | PRLKFDRLI I SLEAKAGVD ILMADFFIHRML--PKNEKILNLI VVQKELGVSVCISINP PHSVFLVNGKGVDRKTMSVQETGQFPDITIKMLKYGANII QAVGYNAST I IAVAFVNLTSFDAPKLDYDAPQVTI D--VPSDVLVLEGPSK-----VSLKCPISFRRIKTIKGRLCKHY             | 343 |
| Sb10g004470_F      | PRLKFDRLI I SLEAKAGVD ILMADFFIHRML--PKNEKILNLI VVQKELGVSVCISINP PHSVFLVNGKGVDRKTMSVQETGQFPDITIKMLKYGANII QAVGYNAST I IAVAFVNLTSFDAPKLDYDAPQVTI D--VPSDVLVLEGPSK-----VSLKCPISFRRIKTIKGRLCKHY             | 343 |
| GRMZM2G075582_T01  | PRLKFDRLI I SLEAKAGVD ILMADFFIHRML--PKNEKILNLI VVQKELGVSVCISINP PHSVFLVNGKGVDRKTMSVQETGQFPDITIKMLKYGANII QAVGYNAST I IAVAFVNLTSFDAPKLDYDAPQVTI D--VPSDVLVLEGPSK-----VSLKCPISFRRIKTIKGRLCKHY             | 343 |
|                    | 1.....20.....30.....40.....50.....60.....70.....80.....90.....100.....110.....120.....130.....140.....150.....160.....170.....180                                                                       |     |
| AT5G41580.1        | QCDFDfSNVHINMRRPTWRCPhCQmQ FVCYFDIRLDQNMARLKVDEHNAAVDI DAGGTWVTKMTEDETE-PVREI I H-----DLEPMSILLNSGFVFDLNGDDA--ELVFQDNKVDREKPSMDAQSQMNNMNTN--KHPNSDNYSSIFDISDVI ALDPEILS--SAGTAPQPH                      | 501 |
| AT1G08910.1        | QCDFDfSNVHINMRRPTWRCPhCQmQ FVCYFDIRLDQNMARLKVDEHNAAVDI DAGGTWVTKMTEDETE-PVREI I H-----DLEPMSILLNSGFVFDLNGDDA--ELVFQDNKVDREKPSMDAQSQMNNMNTN--KHPNSDNYSSIFDISDVI ALDPEILS--SAGTAPQPH                      | 435 |
| POPTR_0003s13280.1 | QCDFDfSNVHINMRRPTWRCPhCQmQ FVCYFDIRLDQNMARLKVDEHNAAVDI DAGGTWVTKMTEDETE-PVREI I H-----DLEPMSILLNSGFVFDLNGDDA--ELVFQDNKVDREKPSMDAQSQMNNMNTN--KHPNSDNYSSIFDISDVI ALDPEILS--SAGTAPQPH                      | 441 |
| GSVVT01026971001   | QCDFDfSNVHINMRRPTWRCPhCQmQ FVCYFDIRLDQNMARLKVDEHNAAVDI DAGGTWVTKMTEDETE-PVREI I H-----DLEPMSILLNSGFVFDLNGDDA--ELVFQDNKVDREKPSMDAQSQMNNMNTN--KHPNSDNYSSIFDISDVI ALDPEILS--SAGTAPQPH                      | 489 |
| GSVVT01026973001   | QCDFDfSNVHINMRRPTWRCPhCQmQ FVCYFDIRLDQNMARLKVDEHNAAVDI DAGGTWVTKMTEDETE-PVREI I H-----DLEPMSILLNSGFVFDLNGDDA--ELVFQDNKVDREKPSMDAQSQMNNMNTN--KHPNSDNYSSIFDISDVI ALDPEILS--SAGTAPQPH                      | 497 |
| GSVVT01019423001   | QCDFDfSNVHINMRRPTWRCPhCQmQ FVCYFDIRLDQNMARLKVDEHNAAVDI DAGGTWVTKMTEDETE-PVREI I H-----DLEPMSILLNSGFVFDLNGDDA--ELVFQDNKVDREKPSMDAQSQMNNMNTN--KHPNSDNYSSIFDISDVI ALDPEILS--SAGTAPQPH                      | 368 |
| Soly08g008130.1.1  | QCDFDfSNVHINMRRPTWRCPhCQmQ FVCYFDIRLDQNMARLKVDEHNAAVDI DAGGTWVTKMTEDETE-PVREI I H-----DLEPMSILLNSGFVFDLNGDDA--ELVFQDNKVDREKPSMDAQSQMNNMNTN--KHPNSDNYSSIFDISDVI ALDPEILS--SAGTAPQPH                      | 512 |
| LOC_0s06g06870.1   | QCDFDfSNVHINMRRPTWRCPhCQmQ FVCYFDIRLDQNMARLKVDEHNAAVDI DAGGTWVTKMTEDETE-PVREI I H-----DLEPMSILLNSGFVFDLNGDDA--ELVFQDNKVDREKPSMDAQSQMNNMNTN--KHPNSDNYSSIFDISDVI ALDPEILS--SAGTAPQPH                      | 502 |
| Bradi1g48426_F     | QCDFDfSNVHINMRRPTWRCPhCQmQ FVCYFDIRLDQNMARLKVDEHNAAVDI DAGGTWVTKMTEDETE-PVREI I H-----DLEPMSILLNSGFVFDLNGDDA--ELVFQDNKVDREKPSMDAQSQMNNMNTN--KHPNSDNYSSIFDISDVI ALDPEILS--SAGTAPQPH                      | 500 |
| Sb10g004470_F      | QCDFDfSNVHINMRRPTWRCPhCQmQ FVCYFDIRLDQNMARLKVDEHNAAVDI DAGGTWVTKMTEDETE-PVREI I H-----DLEPMSILLNSGFVFDLNGDDA--ELVFQDNKVDREKPSMDAQSQMNNMNTN--KHPNSDNYSSIFDISDVI ALDPEILS--SAGTAPQPH                      | 497 |
| GRMZM2G075582_T01  | QCDFDfSNVHINMRRPTWRCPhCQmQ FVCYFDIRLDQNMARLKVDEHNAAVDI DAGGTWVTKMTEDETE-PVREI I H-----DLEPMSILLNSGFVFDLNGDDA--ELVFQDNKVDREKPSMDAQSQMNNMNTN--KHPNSDNYSSIFDISDVI ALDPEILS--SAGTAPQPH                      | 496 |
|                    | .....370.....380.....390.....400.....410.....420.....430.....440.....450.....460.....470.....480.....490.....500.....510.....520.....530.....540                                                        |     |
| AT5G41580.1        | ASMGQQGQQYSNLSQ-----IPMSIDMPF-----VPVFFSQTSPRDRPATTSTVTFINPSPQYQSVHASFVPTPTGTLGRITS-----FRWNQTY--CQSQAPFMTF-----                                                                                        | 593 |
| AT1G08910.1        | TLNADFQGGQVNLQ-----IINTRDPSASQALPMFSFPTSPQDILATNANAGTSMPPAQSSQFGSHVTSLGNCGNCSDLML--ARWNHITGVRVQTQFPFAPLASHHHYSMQ--QSPS-----PAQQRFPVSYIAHPQTFHVNY                                                        | 568 |
| POPTR_0003s13280.1 | FWS--PTWSSASDAQMNVGFSEPTTFMT--SPVITDVSFALMC DVYGGYNT--TTSVMHMGLSASITLQSLQNFVN-----SVLAGE--GTFPEIHYD-----RSPF-----AVQALRFPQTAPQQRSR                                                                      | 528 |
| GSVVT01026971001   | VSYNFVLPPTMSNGQRMFGVSRTPSSFM--SHVLTDAIPSLW-----EATGVHR--ETQMPISSLQNYFRFAGMEIQQTRFGLSSTNEYRMCVCLPMRPTAVIKSRN                                                                                             | 591 |
| GSVVT01026973001   | QFIAVLEINFPSSD-----TRQCICITASLN-----VTELEPTGQWPSMTKSTVSSRCLQNFIRASNMTDFDTITTTISGK-----DTFKPIE ICSSSLTVPSSARRCFR-----SCTPCSWHMWPKCSA                                                                     | 368 |
| GSVVT01019423001   | QFIAVLEINFPSSD-----TRQCICITASLN-----VTELEPTGQWPSMTKSTVSSRCLQNFIRASNMTDFDTITTTISGK-----DTFKPIE ICSSSLTVPSSARRCFR-----SCTPCSWHMWPKCSA                                                                     | 611 |
| Soly08g008130.1.1  | QFIAVLEINFPSSD-----TRQCICITASLN-----VTELEPTGQWPSMTKSTVSSRCLQNFIRASNMTDFDTITTTISGK-----DTFKPIE ICSSSLTVPSSARRCFR-----SCTPCSWHMWPKCSA                                                                     | 615 |
| LOC_0s06g06870.1   | QFIAVLEINFPSSD-----TRQCICITASLN-----VTELEPTGQWPSMTKSTVSSRCLQNFIRASNMTDFDTITTTISGK-----DTFKPIE ICSSSLTVPSSARRCFR-----SCTPCSWHMWPKCSA                                                                     | 619 |
| Bradi1g48426_F     | QFIAVLEINFPSSD-----TRQCICITASLN-----VTELEPTGQWPSMTKSTVSSRCLQNFIRASNMTDFDTITTTISGK-----DTFKPIE ICSSSLTVPSSARRCFR-----SCTPCSWHMWPKCSA                                                                     | 625 |
| Sb10g004470_F      | QFIAVLEINFPSSD-----TRQCICITASLN-----VTELEPTGQWPSMTKSTVSSRCLQNFIRASNMTDFDTITTTISGK-----DTFKPIE ICSSSLTVPSSARRCFR-----SCTPCSWHMWPKCSA                                                                     | 622 |
| GRMZM2G075582_T01  | QFIAVLEINFPSSD-----TRQCICITASLN-----VTELEPTGQWPSMTKSTVSSRCLQNFIRASNMTDFDTITTTISGK-----DTFKPIE ICSSSLTVPSSARRCFR-----SCTPCSWHMWPKCSA                                                                     | 620 |
|                    | .....550.....560.....570.....580.....590.....600.....610.....620.....630.....640.....650.....660.....670.....680.....690.....700.....710.....720                                                        |     |
| AT5G41580.1        | -----YTSRKVSV-----FVTSQS FANVSSVQSQ-----HVPRLVLS-----PNNYGRGLTSSH-----                                                                                                                                  | 639 |
| AT1G08910.1        | -----GENADQHWPFSSIAH-----FPTIPVNGGNTWRF-----PSSIAHPTLPLVNRMGMDHR-----STPYSITHLQTL-----NYGGNADQRFMPSSITNLOTLPATYGGYAHQRPMSSS-----ITHFPTSPVMGGPDP                                                         | 687 |
| POPTR_0003s13280.1 | -----TFNPATISGASLSSHGTFEARMALSPVSGMNDQ--QQFARSLMTSSSSSQMMNDQDHPFHHGQSAAQVAVTFSSQLAGAHARASSPNLLYQQFPLRVPSRHSFNVVRSSLFLAPAQTOQGAAQVGVGMSAGATNSG--QSRLVMAQLAARARQFSS                                       | 686 |
| GSVVT01026971001   | -----IVHFSIRIQFQVQ--RRSSVQVTAAGQER-----QMSMPPSVFVQLPQRTGT-----                                                                                                                                          | 642 |
| GSVVT01026973001   | -----YGCSSASS-----PDDFNALACSKNIQNR-----LERHFSLDL DLVQTRMSTSAL-----PQKRSFLHVQFSQHSVGRQSPSMRTPIPMNQQSQFSQATWDRWEALKQSSQAGVNRALPGQ HARVVITQ-----                                                           | 368 |
| GSVVT01019423001   | -----AMNPLLHAGPAAAQ--DLPIASLSGS NLRSE-----LERHFSLDL DLVQTRMSTSAL-----PQKRSFLHVQFSQHSVGRQSPSMRTPIPMNQQSQFSQATWDRWEALKQSSQAGVNRALPGQ HARVVITQ-----                                                        | 736 |
| Soly08g008130.1.1  | -----PSSPASAYVHQVTTN--ADSVITAMSGVLSLRAPD--AASFLQHQSTQETRAQTNRHGGFGLGTAPEQFNGMTRFPFVGQAIGAM--AHGAPPA-----QQSHHVRL--VSNLMLMGQATVAQPSATAFVLPSPQGGTSAVNFIRGHLFPAQQRSSQAMRQAVVPRTIS--                        | 784 |
| LOC_0s06g06870.1   | -----QSSAASSNQGASHVFN--ADSVITAMSGVLSLRAPD--AASFLQHQSTQETRAQTNRHGGFGLGTAPEQFNGMTRFPFVGQAIGAM--AHGAPPA-----QQSHHVRL--VSNLMLMGQATVAQPSATAFVLPSPQGGTSAVNFIRGHLFPAQQRSSQAMRQAVVPRTIS--                       | 765 |
| Bradi1g48426_F     | -----SSPSSTTQQTQVKN--PDSVIAPMNSGSQPLPRT--AASLHLQSTAREINMSTSHLSRVLGLPAPH--LMGARFPFGISGGQGGAM--AYRPI-----QQTPTLDLRHTRMMNQATLAAAGQTSAAHVRFPT-----ADIQSHLFPVQ--SQAPRSQVPPRAA5PFL                            | 776 |
| Sb10g004470_F      | -----SSPSSTTQQTQVKN--PDSVIAPMNSGSQPLPRT--AASLHLQSTAREINMSTSHLSRVLGLPAPH--LMGARFPFGISGGQGGAM--AYRPI-----QQTPTLDLRHTRMMNQATLAAAGQTSAAHVRFPT-----ADIQSHLFPVQ--SQAPRSQVPPRAA5PFL                            | 777 |
| GRMZM2G075582_T01  | -----SSPSSTTQQTQVKN--PDSVIAPMNSGSQPLPRT--AASLHLQSTAREINMSTSHLSRVLGLPAPH--LMGARFPFGISGGQGGAM--AYRPI-----QQTPTLDLRHTRMMNQATLAAAGQTSAAHVRFPT-----ADIQSHLFPVQ--SQAPRSQVPPRAA5PFL                            | 776 |
|                    | .....730.....740.....750.....760.....770.....780.....790.....800.....810.....820.....830.....840.....850.....860.....870.....880.....890.....900                                                        |     |
| AT5G41580.1        | -----ASTSRQHPGSPVQVSSRLSD--LVDVVDLIVPDSMRRF--RMRGSLVPGSHSTALDH-----IIRFSQQ-----SQTPSRNLMSQVQVT--PVSQTSQAQSPFPTTAYRTEIVLGNRHHVFAFPAGIVRFPGPTS-----                                                       | 760 |
| AT1G08910.1        | -----QRMPSSITHPTQLVSYGGTTQDILNPGGAMQFSS--REFMNLNFAENMRFGRSMRGS--AFQGVYDM-----IHPTRFVHPQAPFPAPFATS YDGADEIQAFIGHPSYFVSNMNETACTS SLVPAEGLGYSQFMSPPEWT--                                                   | 829 |
| POPTR_0003s13280.1 | -----VYFQITSGAGASYLTSADGRAPAT--EQRGNAGGALPAYSTGTE--LVLD-----ASQMGPRFLMGRMRSLSGRAYSAALKEF--MVQFTQQ--TQTFRPFPNLPFSQSMSM--PHLQFLFARNAGVQPAQ-----SSPVTGSAIENSSSSILP-----                                    | 822 |
| GSVVT01026971001   | -----RFSYAMVAEQLRTAAEEERNNMGRTGMAYEQLGT--AWSSFGADALAEWQPGTMRGLTGEADSAAISQF--MLQF-----PTSLTATLESGLFAFW--FPSSSTHNNAMESQTE-----TQGLRSNMAQTGSSGGLPEMTFNI P                                                  | 776 |
| GSVVT01026973001   | -----WERTLLM-----LCSCKCQWG-----                                                                                                                                                                         | 375 |
| GSVVT01019423001   | -----SADRFRFLPPDQRSSSTGGT--PVTTRDS--SVDP--QLDPMRPTGRMRGSLGRAYSEALQF--ILKFTQQ--AAARP--SIPNLS--POLQVLLANRGAHSTQP--VNFPSAPANASISGLILPERSGMO                                                                | 646 |
| Soly08g008130.1.1  | -----QAPFRAGSPFLPATARFPST--PPTGTSDD--LQEL--PVDSWRPTGMRGLTGAYSAVIGRYNPSVNIAGQTSHTVSQARPAAGPARR--                                                                                                         | 883 |
| LOC_0s06g06870.1   | -----QAPFRAGSPFLPATARFPST--PPTGTSDD--LQEL--PVDSWRPTGMRGLTGAYSAVIGRYNPSVNIAGQTSHTVSQARPAAGPARR--                                                                                                         | 872 |
| Bradi1g48426_F     | -----QAPFRAGSPFLPATARFPST--PPTGTSDD--LQEL--PVDSWRPTGMRGLTGAYSAVIGRYNPSVNIAGQTSHTVSQARPAAGPARR--                                                                                                         | 841 |
| Sb10g004470_F      | -----QAPFRAGSPFLPATARFPST--PPTGTSDD--LQEL--PVDSWRPTGMRGLTGAYSAVIGRYNPSVNIAGQTSHTVSQARPAAGPARR--                                                                                                         | 859 |
| GRMZM2G075582_T01  | -----QAPFRAGSPFLPATARFPST--PPTGTSDD--LQEL--PVDSWRPTGMRGLTGAYSAVIGRYNPSVNIAGQTSHTVSQARPAAGPARR--                                                                                                         | 860 |
|                    | .....910.....920.....930.....940.....950.....960.....970.....980.....990.....1000.....1010.....1020.....1030.....1040.....1050.....1060.....1070.....                                                   |     |

Fig. S7 Alignment of SUMO ligase PIAL sequences
