# Supplementary material
Source: PubMed Central journal article supplement (PMC3399776)
Supplement: NIHMS48686-supplement-Fig__S8.pdf [file NIHMS48686-supplement-Fig__S8.pdf]

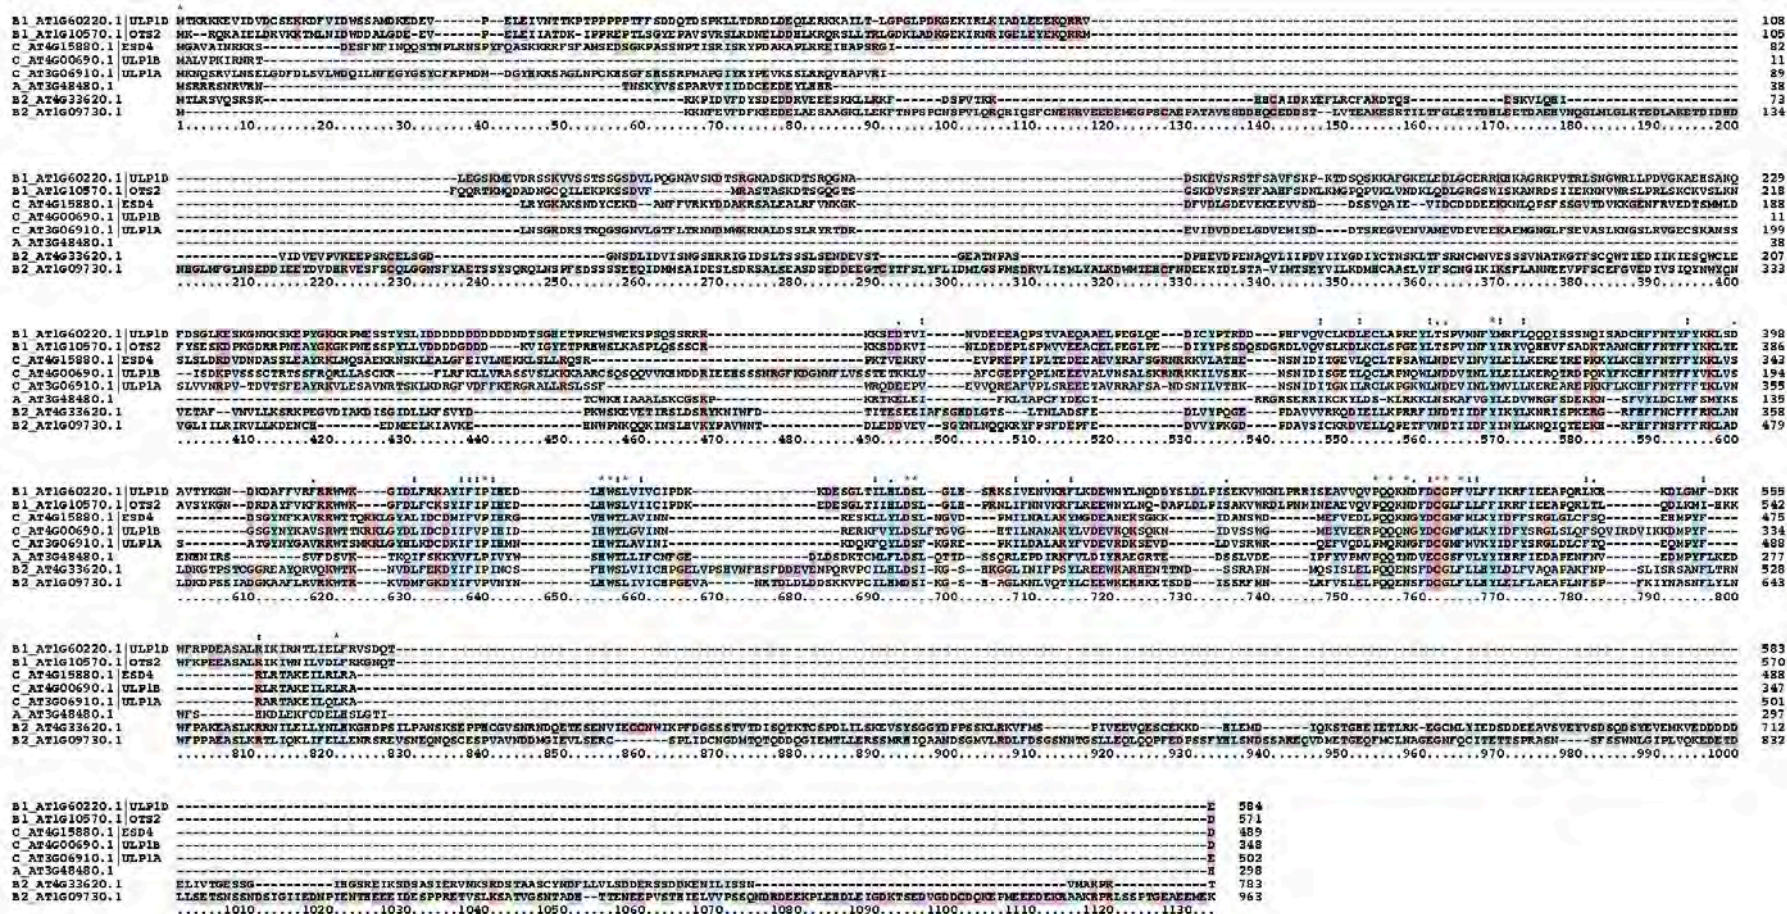

**Fig. S8** Alignment of protein sequences with proven SUMO protease activity and their closest relatives from *Arabidopsis thaliana*
