# Supplementary material
Source: PubMed Central journal article supplement (PMC3399776)
Supplement: NIHMS48686-supplement-Fig__S9.pdf [file NIHMS48686-supplement-Fig__S9.pdf]

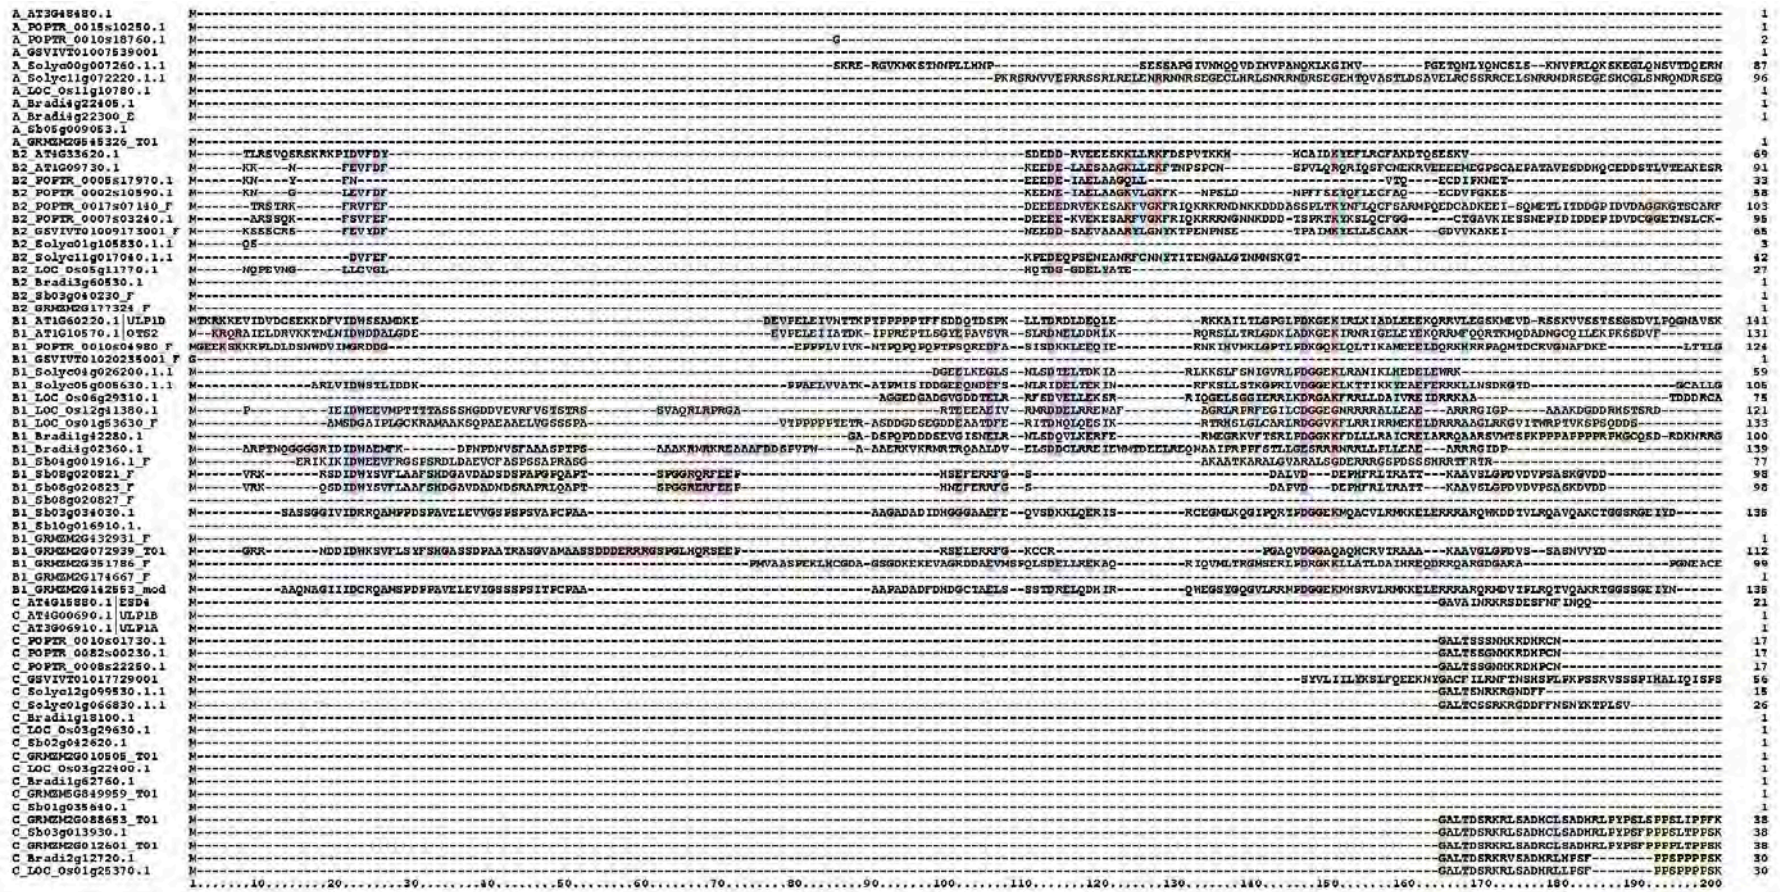

Fig. S9 Sequence alignment of proteins from four groups of predicted SUMO proteases











|                        |                                                                                                                                                                                   |     |
|------------------------|-----------------------------------------------------------------------------------------------------------------------------------------------------------------------------------|-----|
| A_AT3948860.1          | -----TDECT-R-----RGR-S-----E-----E-----RRIRKXIL-----D-SKLRKLNKSAFVGY-LE-----D-VNRFGRDEK--KNSF                                                                                     | 122 |
| A_POPTR_0018510280.1   | -----LQTFP-C-----SKR-S-----K-----R-RRIRKKA-----IWKIIPKIKLDSGAFDCL-FE-----MHRNRFEDK--RIFI                                                                                          | 119 |
| A_POPTR_0018510710.1   | -----LQTFP-C-----SKR-S-----K-----R-RRIRKKA-----IWKIIPKIKLDSGAFDCL-FE-----MHRNRFEDK--RIFI                                                                                          | 119 |
| A_GSVIVT01007539001.1  | -----SMTP-R-----HER-S-----K-----R-RRIRKNI-----IIRKRNKLDYAFKFWY-FR-----NWKFSBDDK--KNSF                                                                                             | 118 |
| A_Soly0009007260.1.1   | -----SQIKP-RPMSKKA-S-----K-----R-RTADETSEVPLRASRGGGKANNKGLGSKFLX-LE-----MIRKLPEDK--KNSF                                                                                           | 266 |
| A_Soly0119072220.1.1   | -----LCKLSCSRHRSREGEFLK-GLSKRRN-S-----R-----R-SEGEFR-----RHSRSGKLNKSDFDCL-LE-----MIRKLPEDK--KNSF                                                                                  | 286 |
| A_LOC_0811910780.1     | -----DQMLP-F-----HRS-S-----K-----R-IAISK-----RDKRDKKLDTEIFELY-NE-----DIWHRIDEDK--KSAV                                                                                             | 87  |
| A_Brad14g221605.1      | -----YDMLP-Q-----HRS-S-----K-----R-MIYSE-----RERKDKKLDTEIFELY-NE-----DIWHRIDEDK--KSAV                                                                                             | 96  |
| A_Brad14g22300.Z       | -----YDMLP-Q-----SRV-S-----E-----R-HAISR-----RDKRDKKLDTEIFELY-NE-----DIWHRIDEDK--KSAV                                                                                             | 73  |
| A_Brad14g22300.Z       | -----YDMLP-Q-----SRV-S-----E-----R-HAISR-----RDKRDKKLDTEIFELY-NE-----DIWHRIDEDK--KSAV                                                                                             | 73  |
| A_GRM2MG0545326_T01    | -----YDMLP-Q-----GRA-S-----R-----R-HAISR-----RDKRDKKLDTEIFELY-NE-----DIWHRIDEDK--KSAV                                                                                             | 113 |
| B2_AT4633620.1         | -----SRKEGGVLIARDISGIDLLAFVSDVEMSRVETIR-SLDSRHK-NIWFDTIT-----ESETAFSGHDLGSL-----THLADSFEDLVY-----FG-----GDPA-----VVVRQDI-----ELNLPKRFIMDTIIDFY-IR-----ELNLPISFKE--RGRF            | 345 |
| B2_AT1609730.1         | -----LKD-----ENCHDEMEELIKVKNEMPKRQKIM-SLWVETP-AVWMDLE-----DDVEVS-GI-----LMDQRKFPSTDFEDVY-----FK-----GDPA-----VEISKRDV-----ELLPETVNDTIIDFY-IR-----ELNLPISFKE--RGRF                 | 166 |
| B2_POPTR_0008511970.1  | -----KSDVADQADTQMGSGVELEVVVVEPMNRKNEETI-SLNRKYS-ALLSVIND-----MDIANN-GV-----DELDQRRTVPSDFSEKEDVYI-----FK-----GDPA-----VEISKRDV-----ELLPETVNDTIIDFY-IR-----ELNLPISFKE--RGRF         | 369 |
| B2_POPTR_0002510590.1  | -----SKDVAQADTQMGSGVELEVVVVEPMNRKNEETI-SLNRKYS-ALLSVIND-----MDIANN-GV-----DELDQRRTVPSDFSEKEDVYI-----FK-----GDPA-----VEISKRDV-----ELLPETVNDTIIDFY-IR-----ELNLPISFKE--RGRF          | 369 |
| B2_POPTR_0017601140.F  | -----VDLKNFVSDVEMSRVETIR-SLWVETP-AVWMDLE-----DDVEVS-GI-----LMDQRKFPSTDFEDVY-----FK-----GDPA-----VEISKRDV-----ELLPETVNDTIIDFY-IR-----ELNLPISFKE--RGRF                              | 378 |
| B2_POPTR_0007503240.1  | -----KVSQGNMNDTQMGSGVELEVVVVEPMNRKNEETI-SLNRKYS-ALLSVIND-----MDIANN-GV-----DELDQRRTVPSDFSEKEDVYI-----FK-----GDPA-----VEISKRDV-----ELLPETVNDTIIDFY-IR-----ELNLPISFKE--RGRF         | 378 |
| B2_GSVIVT01009173001.F | -----RAM-----WIELKAFVVDENRVEGRKTI-SLNRKYS-ALLSVIND-----MDIANN-GV-----DELDQRRTVPSDFSEKEDVYI-----FK-----GDPA-----VEISKRDV-----ELLPETVNDTIIDFY-IR-----ELNLPISFKE--RGRF               | 362 |
| B2_Soly0019105830.1.1  | -----CNDSDVYVNDNESGAVLVLFDLFDVNSIEGALK-MLNVRKA-DKWNIDTA-----LDPTREYGFYGRKISIVLENDHPNTRFPEIIF-----FE-----GDPA-----VEISKRDV-----ELLPETVNDTIIDFY-IR-----ELNLPISFKE--RGRF             | 215 |
| B2_Soly0119017040.1.1  | -----KRTTAGENMAGTSSIEEVEFAVDVDSSEKCAIQ-SLDV-YK-AVWNSHSE-----NEKWRNSQGET-----SNQLPKKXTPSYTEPELVY-----FK-----GDPA-----VCISKRDF-----DLLPETVNDTIIDFY-IR-----ELNLPISFKE--RGRF          | 366 |
| B2_LOC_080511170.1     | -----VSGSTEZGMSKDRIDFCLIDSDVPRKQNIW-HLASKYQ-EIWNHIPS-----GDFASEMNIIEP-----SLFPFQVYFDTE-EPEDVYI-----FK-----GDPA-----VEISKRDV-----ELLPETVNDTIIDFY-IR-----ELNLPISFKE--RGRF           | 338 |
| B2_Brad14g60830.1      | -----VGSKARAKNSGPRVUFGLADVEMNRKQEKIW-HLASKYQ-EIWNHIPS-----GDFASEMNIIEP-----SLFPFQVYFDTE-EPEDVYI-----FK-----GDPA-----VEISKRDV-----ELLPETVNDTIIDFY-IR-----ELNLPISFKE--RGRF          | 293 |
| B2_Soly02040230.F      | -----PVKAGFSLDQVPRKQEKIW-HLASKYQ-EIWNHIPS-----GDFASEMNIIEP-----SLFPFQVYFDTE-EPEDVYI-----FK-----GDPA-----VEISKRDV-----ELLPETVNDTIIDFY-IR-----ELNLPISFKE--RGRF                      | 226 |
| B2_GSM2MG0117324.F     | -----SFCVGVDEVAIVGVEDTCSGGPVRKFELEDSGPRKQEKIW-HLASKYQ-EIWNHIPS-----GDFASEMNIIEP-----SLFPFQVYFDTE-EPEDVYI-----FK-----GDPA-----VEISKRDV-----ELLPETVNDTIIDFY-IR-----ELNLPISFKE--RGRF | 184 |
| B1_AT160420.1.UPLID    | -----EAGPSTVAEQAL-ELFEGG-F-----D-ICY-----FTK-----DDPHF-----VQVCLKDL-----KCLAPKAYLISPVNHFY-IR-----YVQDIPVADK-TAANC                                                                 | 373 |
| B1_AT1610870.1.0T82    | -----EFLSPVVEAC-ELFEGG-F-----D-ICY-----FTK-----DDPHF-----VQVCLKDL-----KCLAPKAYLISPVNHFY-IR-----YVQDIPVADK-TAANC                                                                   | 373 |
| B1_POPTR_0010804980.F  | -----EFG-LGTTELAK-ELCHKH-D-----AKIYS-ADPA-S-----R-----R-IRLQASFAVAKKVD-----KCLAPKAYLISPVNHFY-IR-----YVQDIPVADK-TAANC                                                              | 332 |
| B1_GSVIVT01002028001.F | -----EFLDKPMQAT-KITDRK-E-----D-ICY-----FTK-----DDPHF-----VQVCLKDL-----KCLAPKAYLISPVNHFY-IR-----YVQDIPVADK-TAANC                                                                   | 100 |
| B1_Soly0046028200.1.1  | -----EFLDKPMQAT-KITDRK-E-----D-ICY-----FTK-----DDPHF-----VQVCLKDL-----KCLAPKAYLISPVNHFY-IR-----YVQDIPVADK-TAANC                                                                   | 240 |
| B1_Soly0086009530.1.1  | -----EFDVVEFQDQAN-HVSEKX-A-----D-ICY-----FTK-----DDPHF-----VQVCLKDL-----KCLAPKAYLISPVNHFY-IR-----YVQDIPVADK-TAANC                                                                 | 246 |
| B1_LOC_080629310.1     | -----TCI-----SDRAE-KSSACD-A-----MKNHY-FSW-----DTPN-----LELSYSDM-----KCLPEPELSSPVNHFY-IR-----YVQDIPVADK-TAANC                                                                      | 285 |
| B1_LOC_081291380.1     | -----DQVE-----GQVDC-FMMDRN-E-----MKNHY-FSW-----DTPN-----LELSYSDM-----KCLPEPELSSPVNHFY-IR-----YVQDIPVADK-TAANC                                                                     | 370 |
| B1_LOC_080193830.F     | -----DQVE-----GQVDC-FMMDRN-E-----MKNHY-FSW-----DTPN-----LELSYSDM-----KCLPEPELSSPVNHFY-IR-----YVQDIPVADK-TAANC                                                                     | 387 |
| B1_Brad14g22280.1      | -----MKNHY-FSW-----DTPN-----LELSYSDM-----KCLPEPELSSPVNHFY-IR-----YVQDIPVADK-TAANC                                                                                                 | 215 |
| B1_Brad14g22360.1      | -----DQVE-----EFVDC-VSDKI-E-----MKNHY-FSW-----DTPN-----LELSYSDM-----KCLPEPELSSPVNHFY-IR-----YVQDIPVADK-TAANC                                                                      | 335 |
| B1_Sb04g001916.1.F     | -----DQVE-----EFVDC-VSDKI-E-----MKNHY-FSW-----DTPN-----LELSYSDM-----KCLPEPELSSPVNHFY-IR-----YVQDIPVADK-TAANC                                                                      | 271 |
| B1_Sb04g020230.1.F     | -----DQVE-----EFVDC-VSDKI-E-----MKNHY-FSW-----DTPN-----LELSYSDM-----KCLPEPELSSPVNHFY-IR-----YVQDIPVADK-TAANC                                                                      | 280 |
| B1_Sb08g020823.F       | -----DQVE-----EFVDC-VSDKI-E-----MKNHY-FSW-----DTPN-----LELSYSDM-----KCLPEPELSSPVNHFY-IR-----YVQDIPVADK-TAANC                                                                      | 276 |
| B1_Sb08g020827.F       | -----DQVE-----EFVDC-VSDKI-E-----MKNHY-FSW-----DTPN-----LELSYSDM-----KCLPEPELSSPVNHFY-IR-----YVQDIPVADK-TAANC                                                                      | 84  |
| B1_Sb03g03030.1        | -----DQVE-----EFVDC-VSDKI-E-----MKNHY-FSW-----DTPN-----LELSYSDM-----KCLPEPELSSPVNHFY-IR-----YVQDIPVADK-TAANC                                                                      | 327 |
| B1_Sb10g014910.1       | -----DQVE-----EFVDC-VSDKI-E-----MKNHY-FSW-----DTPN-----LELSYSDM-----KCLPEPELSSPVNHFY-IR-----YVQDIPVADK-TAANC                                                                      | 26  |
| B1_GRM2MG0432931.F     | -----DQVE-----EFVDC-VSDKI-E-----MKNHY-FSW-----DTPN-----LELSYSDM-----KCLPEPELSSPVNHFY-IR-----YVQDIPVADK-TAANC                                                                      | 26  |
| B1_GRM2MG072939_T01    | -----DQVE-----EFVDC-VSDKI-E-----MKNHY-FSW-----DTPN-----LELSYSDM-----KCLPEPELSSPVNHFY-IR-----YVQDIPVADK-TAANC                                                                      | 317 |
| B1_GRM2MG0138175.F     | -----DQVE-----EFVDC-VSDKI-E-----MKNHY-FSW-----DTPN-----LELSYSDM-----KCLPEPELSSPVNHFY-IR-----YVQDIPVADK-TAANC                                                                      | 317 |
| B1_GRM2MG0174667.F     | -----DQVE-----EFVDC-VSDKI-E-----MKNHY-FSW-----DTPN-----LELSYSDM-----KCLPEPELSSPVNHFY-IR-----YVQDIPVADK-TAANC                                                                      | 182 |
| B1_GRM2MG0142553_mod   | -----DQVE-----EFVDC-VSDKI-E-----MKNHY-FSW-----DTPN-----LELSYSDM-----KCLPEPELSSPVNHFY-IR-----YVQDIPVADK-TAANC                                                                      | 347 |
| C_AT4615880.1.E8D4     | -----FRVEDISVGLDSELDVVDN-DASSLEAZKMLQMSAE-KRNKSLK-ZALGFEVLNENKLLSRSRPTVE-----KRVEVFRPFIETLDEEAEVYKAFSGRN-RKRVLAHNSHNS-IDTIGEDL-----KCLIPSAWLNDEVINLY-LE-----LIEREREPKFLK          | 230 |
| C_AT4606690.1.UPLID    | -----RTEFPRKRLACKRFLNFKLLVRASVLEKKAARCSQGVVNDKRIEHSNSRGRFGKGNFVSSDET-----KRLVAQGEFQFLMDEEVALVNSALSKRN-RKRVLAHNSHNS-IDTIGEDL-----KCLIPSAWLNDEVINLY-LE-----LIEREREPKFLK             | 181 |
| C_AT3606910.1.UPLID    | -----RVEGCSKANSBSLVNRPVPT-----DVTGFVAKRNVLEGAV-NRKSRLK-DRGFVDFKRRGALLRSLSSVWQDEEPEVQREAFVLSPEEETAVRRAFSN-----DENLIVYRNSHNS-IDTIGEDL-----KCLIPSAWLNDEVINLY-LE-----LIEREREPKFLK     | 342 |
| C_POPTR_00106001730.1  | -----LAVENRGMGLSGLALNHPT-----GVLVTEVTKLLEDEE-RNRKRLG-SLAFEILYVNRKMSFKALRFPVKE-----FVEKISNPFIEETPEEIVKQAFVFN-RKRVLAHNSHNS-IDTIGEDL-----KCLIPSAWLNDEVINLY-LE-----LIEREREPKFLK       | 358 |
| C_POPTR_0008522250.1   | -----LAVENRGMGLSGLALNHPT-----GVLVTEVTKLLEDEE-RNRKRLG-SLAFEILYVNRKMSFKALRFPVKE-----FVEKISNPFIEETPEEIVKQAFVFN-RKRVLAHNSHNS-IDTIGEDL-----KCLIPSAWLNDEVINLY-LE-----LIEREREPKFLK       | 358 |
| C_GSVIVT0101729001     | -----LAVENRGMGLSGLALNHPT-----GVLVTEVTKLLEDEE-RNRKRLG-SLAFEILYVNRKMSFKALRFPVKE-----FVEKISNPFIEETPEEIVKQAFVFN-RKRVLAHNSHNS-IDTIGEDL-----KCLIPSAWLNDEVINLY-LE-----LIEREREPKFLK       | 358 |
| C_Soly0129099520.1.1   | -----LAVENRGMGLSGLALNHPT-----GVLVTEVTKLLEDEE-RNRKRLG-SLAFEILYVNRKMSFKALRFPVKE-----FVEKISNPFIEETPEEIVKQAFVFN-RKRVLAHNSHNS-IDTIGEDL-----KCLIPSAWLNDEVINLY-LE-----LIEREREPKFLK       | 362 |
| C_Soly0019068830.1.1   | -----LAVENRGMGLSGLALNHPT-----GVLVTEVTKLLEDEE-RNRKRLG-SLAFEILYVNRKMSFKALRFPVKE-----FVEKISNPFIEETPEEIVKQAFVFN-RKRVLAHNSHNS-IDTIGEDL-----KCLIPSAWLNDEVINLY-LE-----LIEREREPKFLK       | 358 |
| C_Brad11g18100.1       | -----LAVENRGMGLSGLALNHPT-----GVLVTEVTKLLEDEE-RNRKRLG-SLAFEILYVNRKMSFKALRFPVKE-----FVEKISNPFIEETPEEIVKQAFVFN-RKRVLAHNSHNS-IDTIGEDL-----KCLIPSAWLNDEVINLY-LE-----LIEREREPKFLK       | 234 |
| C_LOC_080329630.1      | -----LAVENRGMGLSGLALNHPT-----GVLVTEVTKLLEDEE-RNRKRLG-SLAFEILYVNRKMSFKALRFPVKE-----FVEKISNPFIEETPEEIVKQAFVFN-RKRVLAHNSHNS-IDTIGEDL-----KCLIPSAWLNDEVINLY-LE-----LIEREREPKFLK       | 237 |
| C_Sb02g042620.1        | -----LAVENRGMGLSGLALNHPT-----GVLVTEVTKLLEDEE-RNRKRLG-SLAFEILYVNRKMSFKALRFPVKE-----FVEKISNPFIEETPEEIVKQAFVFN-RKRVLAHNSHNS-IDTIGEDL-----KCLIPSAWLNDEVINLY-LE-----LIEREREPKFLK       | 247 |
| C_GSM2MG010505_T01     | -----LAVENRGMGLSGLALNHPT-----GVLVTEVTKLLEDEE-RNRKRLG-SLAFEILYVNRKMSFKALRFPVKE-----FVEKISNPFIEETPEEIVKQAFVFN-RKRVLAHNSHNS-IDTIGEDL-----KCLIPSAWLNDEVINLY-LE-----LIEREREPKFLK       | 377 |
| C_LOC_080322240.1      | -----LAVENRGMGLSGLALNHPT-----GVLVTEVTKLLEDEE-RNRKRLG-SLAFEILYVNRKMSFKALRFPVKE-----FVEKISNPFIEETPEEIVKQAFVFN-RKRVLAHNSHNS-IDTIGEDL-----KCLIPSAWLNDEVINLY-LE-----LIEREREPKFLK       | 258 |
| C_Brad11g2760.1        | -----LAVENRGMGLSGLALNHPT-----GVLVTEVTKLLEDEE-RNRKRLG-SLAFEILYVNRKMSFKALRFPVKE-----FVEKISNPFIEETPEEIVKQAFVFN-RKRVLAHNSHNS-IDTIGEDL-----KCLIPSAWLNDEVINLY-LE-----LIEREREPKFLK       | 243 |
| C_GRM2MG049989_T01     | -----LAVENRGMGLSGLALNHPT-----GVLVTEVTKLLEDEE-RNRKRLG-SLAFEILYVNRKMSFKALRFPVKE-----FVEKISNPFIEETPEEIVKQAFVFN-RKRVLAHNSHNS-IDTIGEDL-----KCLIPSAWLNDEVINLY-LE-----LIEREREPKFLK       | 264 |
| C_GSM2MG035640.1       | -----LAVENRGMGLSGLALNHPT-----GVLVTEVTKLLEDEE-RNRKRLG-SLAFEILYVNRKMSFKALRFPVKE-----FVEKISNPFIEETPEEIVKQAFVFN-RKRVLAHNSHNS-IDTIGEDL-----KCLIPSAWLNDEVINLY-LE-----LIEREREPKFLK       | 219 |
| C_GSM2MG088063_T01     | -----LAVENRGMGLSGLALNHPT-----GVLVTEVTKLLEDEE-RNRKRLG-SLAFEILYVNRKMSFKALRFPVKE-----FVEKISNPFIEETPEEIVKQAFVFN-RKRVLAHNSHNS-IDTIGEDL-----KCLIPSAWLNDEVINLY-LE-----LIEREREPKFLK       | 335 |
| C_Sb03g013930.1        | -----LAVENRGMGLSGLALNHPT-----GVLVTEVTKLLEDEE-RNRKRLG-SLAFEILYVNRKMSFKALRFPVKE-----FVEKISNPFIEETPEEIVKQAFVFN-RKRVLAHNSHNS-IDTIGEDL-----KCLIPSAWLNDEVINLY-LE-----LIEREREPKFLK       | 340 |
| C_GSM2MG012601_T01     | -----LAVENRGMGLSGLALNHPT-----GVLVTEVTKLLEDEE-RNRKRLG-SLAFEILYVNRKMSFKALRFPVKE-----FVEKISNPFIEETPEEIVKQAFVFN-RKRVLAHNSHNS-IDTIGEDL-----KCLIPSAWLNDEVINLY-LE-----LIEREREPKFLK       | 342 |
| C_Brad1212720.1        | -----LAVENRGMGLSGLALNHPT-----GVLVTEVTKLLEDEE-RNRKRLG-SLAFEILYVNRKMSFKALRFPVKE-----FVEKISNPFIEETPEEIVKQAFVFN-RKRVLAHNSHNS-IDTIGEDL-----KCLIPSAWLNDEVINLY-LE-----LIEREREPKFLK       | 323 |
| C_LOC_0801925370.1     | -----LAVENRGMGLSGLALNHPT-----GVLVTEVTKLLEDEE-RNRKRLG-SLAFEILYVNRKMSFKALRFPVKE-----FVEKISNPFIEETPEEIVKQAFVFN-RKRVLAHNSHNS-IDTIGEDL-----KCLIPSAWLNDEVINLY-LE-----LIEREREPKFLK       | 339 |

Fig. S9 continued























|                        |             |      |
|------------------------|-------------|------|
| A_AT3G48480.1          | -----       | 288  |
| A_POPTR_0018s10280.1   | -----       | 292  |
| A_POPTR_0010s18760.1   | -----       | 298  |
| A_GSVIVT01007539001    | -----       | 296  |
| A_Solyc00g007260.1.1   | -----       | 360  |
| A_Solyc11g072220.1.1   | -----       | 379  |
| A_LOC_0s11g0780.1      | -----       | 165  |
| A_Brad1g22406.1        | -----       | 266  |
| A_Brad1g22360.E        | -----       | 265  |
| A_Sb05g009053.1        | -----       | 238  |
| A_GRMGM2G949329_T01    | -----       | 300  |
| B1_AT1G33620.1         | -----       | 753  |
| B2_AT1G09730.1         | K-----      | 963  |
| B2_POPTR_0008s17970.1  | -----       | 956  |
| B2_POPTR_0002s10990.1  | TKSLKDLAL   | 1041 |
| B2_POPTR_0017s07140.F  | -----       | 651  |
| B2_POPTR_0007s03240.1  | -----       | 871  |
| B2_GSVIVT01009173001.F | HKSLKDLAL   | 898  |
| B2_Solyc01g105830.1.1  | DLS-----    | 770  |
| B2_Solyc11g017040.1.1  | RSSVTMDLIL  | 855  |
| B2_LOC_0s05g11770.1    | ---ATP----  | 991  |
| B2_Brad1g60830.1       | -----F----- | 928  |
| B2_Sb03g040230.F       | ETSTD-----  | 1069 |
| B2_GRMGM2G177324.F     | -----       | 394  |
| B1_AT1G060220.1 ULP1D  | -----       | 584  |
| B1_AT1G10570.1 0352    | -----       | 571  |
| B1_POPTR_0010s04480.F  | -----       | 845  |
| B1_GSVIVT01020235001.F | -----       | 382  |
| B1_Solyc01g026200.1.1  | -----       | 437  |
| B1_Solyc05g006630.1.1  | -----       | 544  |
| B1_LOC_0s06g29310.1    | -----       | 522  |
| B1_LOC_0s12g1360.1     | -----       | 725  |
| B1_LOC_0s01g3630.F     | -----       | 504  |
| B1_Brad1g42280.1       | -----       | 875  |
| B1_Brad1g02360.I       | -----       | 669  |
| B1_Sb01g001916.1.F     | -----       | 693  |
| B1_Sb06g020821.F       | -----       | 878  |
| B1_Sb06g020823.F       | -----       | 875  |
| B1_Sb06g020827.F       | -----       | 356  |
| B1_Sb03g034020.1       | -----       | 537  |
| B1_Sb10g016910.1.      | -----       | 220  |
| B1_GRMGM2G432931.F     | -----       | 335  |
| B1_GRMGM2G072529_T01   | -----       | 629  |
| B1_GRMGM2G381786.F     | -----       | 547  |
| B1_GRMGM2G174667.F     | -----       | 472  |
| B1_GRMGM2G142853_mod   | -----       | 553  |
| C_AT4G18880.1 ESD4     | -----       | 489  |
| C_AT1G000590.1 ULP1B   | -----       | 315  |
| C_AT3G06910.1 ULP1A    | -----       | 802  |
| C_POPTR_0010s01730.1   | -----       | 511  |
| C_POPTR_0082s00230.1   | -----       | 516  |
| C_POPTR_0008s22280.1   | -----       | 516  |
| C_GSVIVT01017729001    | -----       | 556  |
| C_Solyc12g099830.1.1   | -----       | 522  |
| C_Solyc01g066830.1.1   | -----       | 515  |
| C_Brad1g18100.1        | -----       | 403  |
| C_LOC_0s03g29630.1     | -----       | 397  |
| C_Sb02g042620.1        | -----       | 306  |
| C_GRMGM2G010608_T01    | -----       | 524  |
| C_LOC_0s03g22400.1     | -----       | 418  |
| C_Brad1g62760.1        | -----       | 403  |
| C_GRMGM2G849959_T01    | -----       | 413  |
| C_Sb01g038640.1        | -----       | 409  |
| C_GRMGM2G088683_T01    | -----       | 493  |
| C_Sb03g013930.1        | -----       | 498  |
| C_GRMGM2G012601_T01    | -----       | 500  |
| C_Brad1g12720.1        | -----       | 381  |
| C_LOC_0s01g25370.1     | -----       | 197  |
| .....1810              |             |      |

Fig. S9 continued
