# Supplementary material
Source: PubMed Central journal article supplement (PMC3399776)

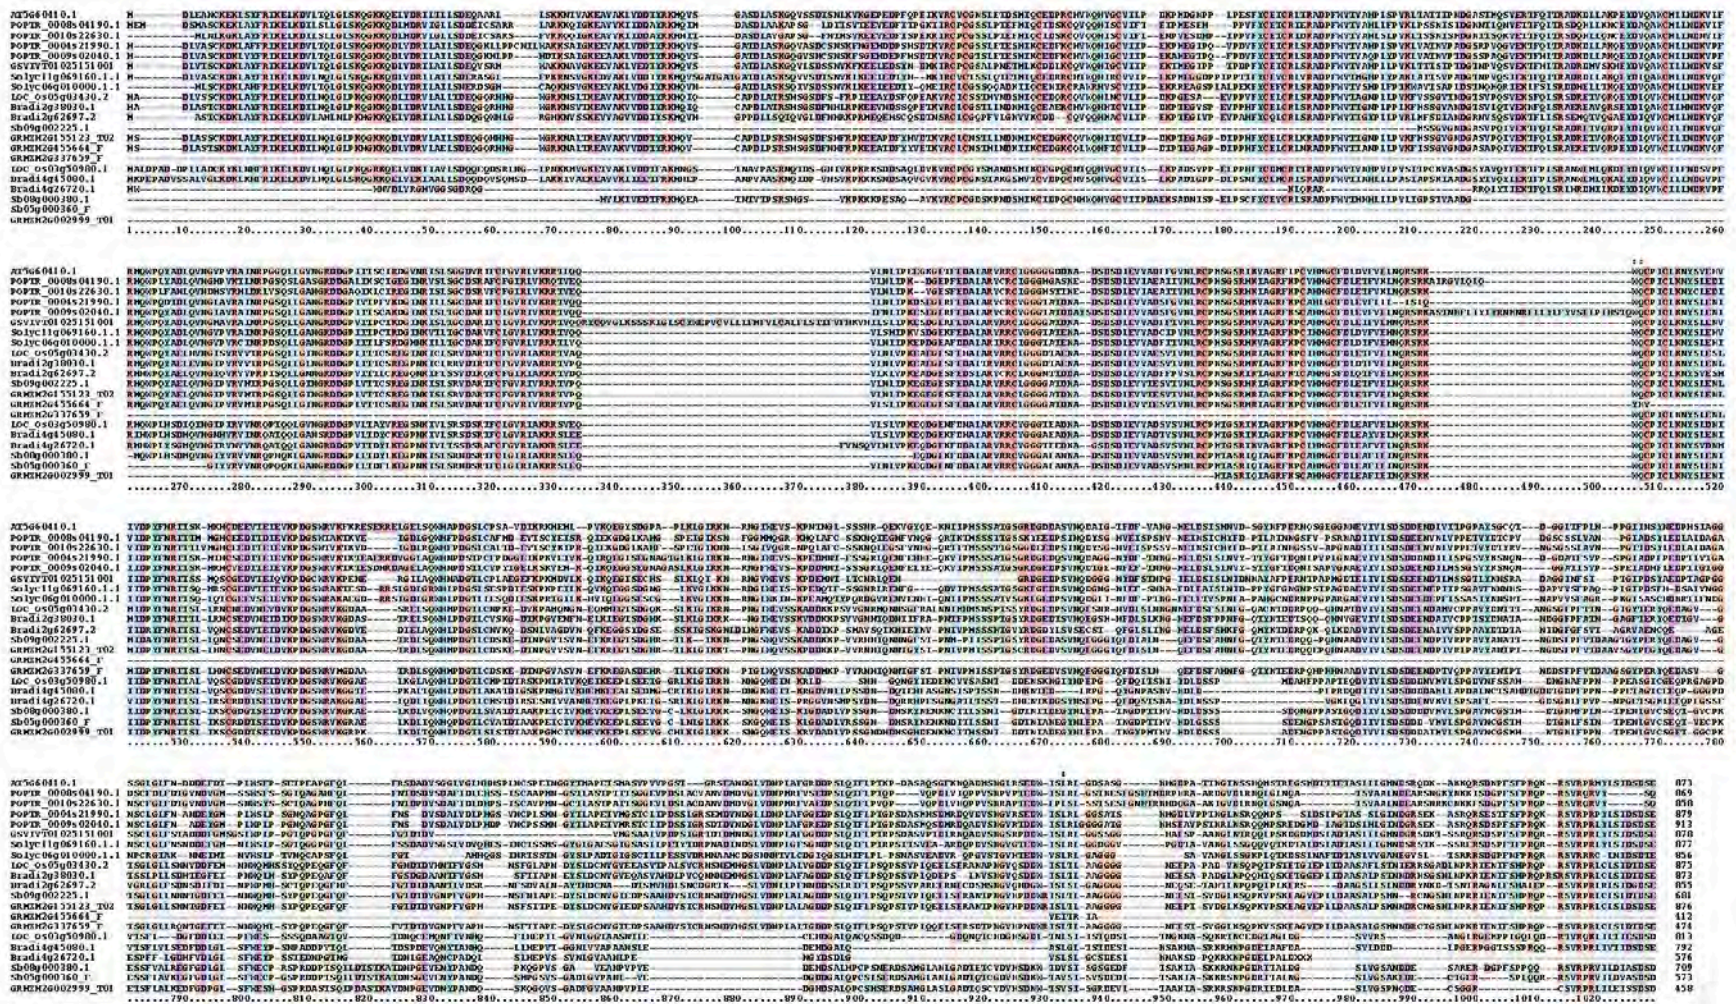

Fig. S5 Alignment of SLMO ligase SZ1 type protein sequences

Supplement: NIHMS48686-supplement-Fig__S5.pdf [file NIHMS48686-supplement-Fig__S5.pdf]
